# Supplementary material
Source: PubMed Central journal article supplement (PMC3320164)
Supplement: NIHMS91229-supplement-1_si_001.pdf [file NIHMS91229-supplement-1_si_001.pdf]

## Supporting Information

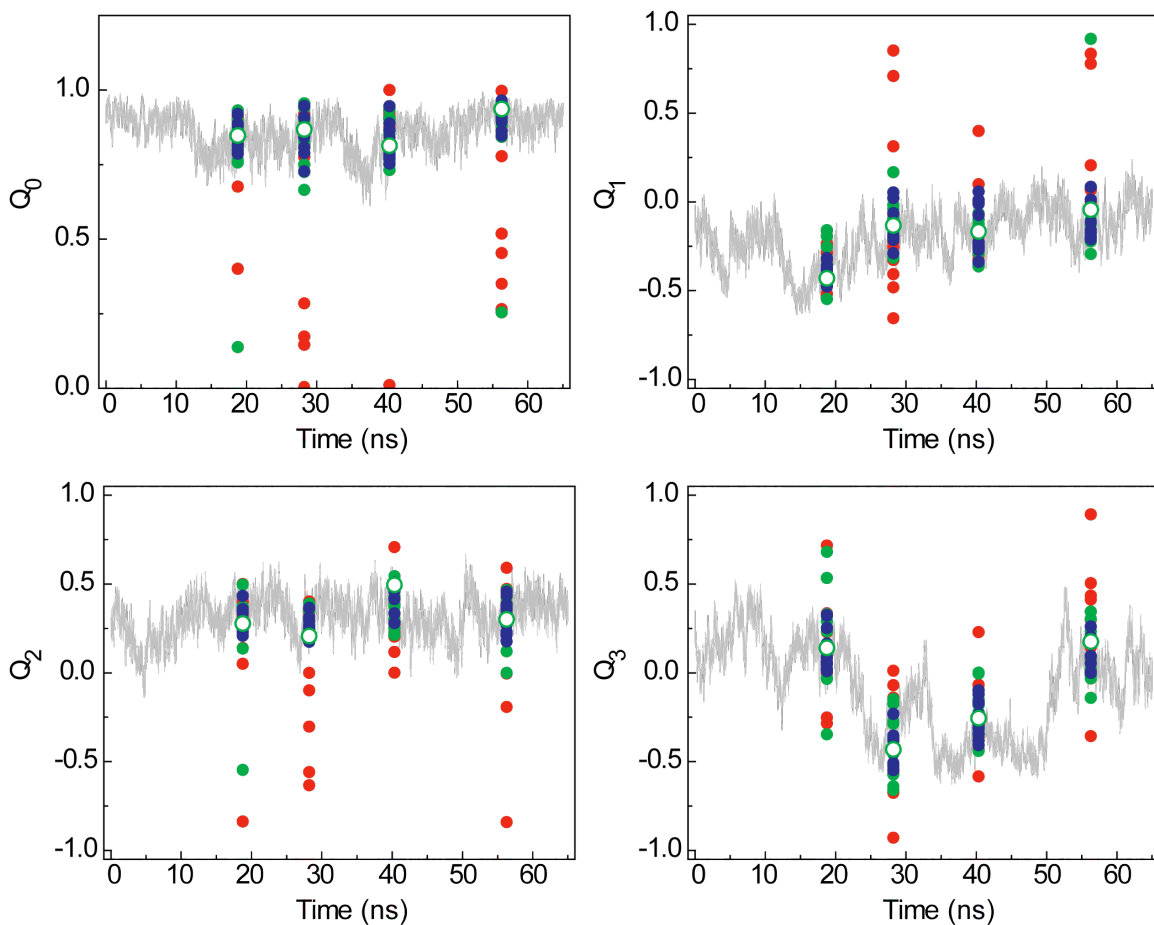

**Figure S1.** 4-state ensemble fit to  $\langle D_{nk}^2(\alpha\beta\gamma) \rangle_{real}$  computed for a motional model involving collective motions of two helical domains in a 65 ns molecular dynamics simulation of TAR RNA<sup>25,34</sup>. Comparison of the MD trajectory (shown in gray) and 4 (open green circles) state ensemble. Also shown are ensembles calculated for 10 iterations with three levels of error; (blue circles)  $\leq 5^\circ$  uncertainty in orientation and  $\leq 5\%$  uncertainty in magnitude, (green circles)  $5^\circ$ - $10^\circ$  uncertainty in orientation and 5-10 % uncertainty in magnitude, (red circles)  $10^\circ$ - $15^\circ$  uncertainty in orientation and 10-15 % uncertainty in magnitude. The order of the four states was chosen to minimize the overall RMSD compared to the zero error ensemble. Each state defined as an inter-helical

domain orientation is represented using a unit quaternion; a 4-dimensional complex number that represents an orientation as a single axis rotation from the z-axis. The relationship between the quaternions and the Euler angles is given in Equation 14. Shown are the values for the four quaternion components;  $Q_0$ ,  $Q_1$ ,  $Q_2$ , and  $Q_3$ .  $Q_0$  encodes the rotational amplitude and  $Q_1$ ,  $Q_2$ , and  $Q_3$  encode the x, y and z components of the rotation axis, respectively.

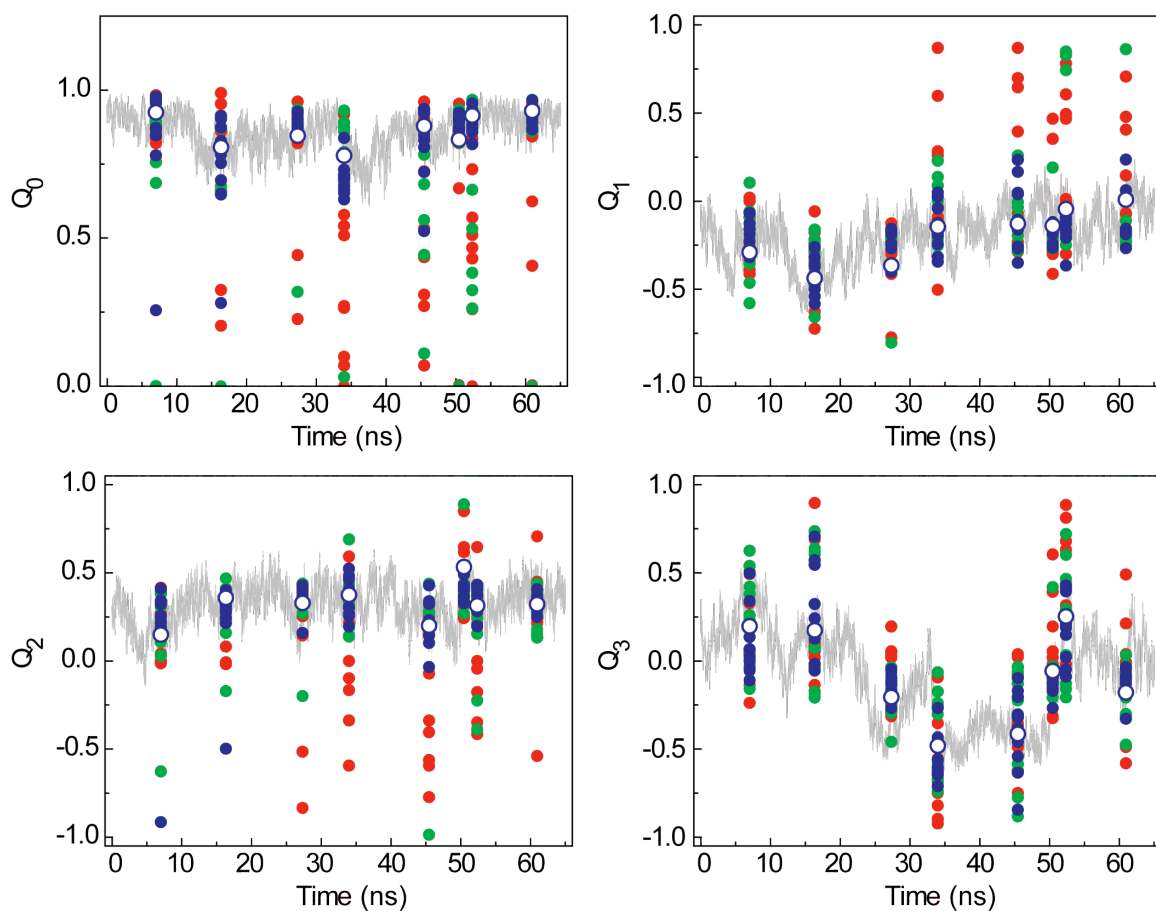

**Figure S2.** 8-state ensemble fit to  $\langle D_{nk}^2(\alpha\beta\gamma) \rangle_{real}$  computed for a motional model involving collective motions of two helical domains in a 65 ns molecular dynamics simulation of TAR RNA<sup>25,34</sup>. Comparison of the MD trajectory (shown in gray) and 8

(open blue circles) state ensemble. Also shown are ensembles calculated for 10 iterations with three levels of error; (blue circles)  $\leq 5^\circ$  uncertainty in orientation and  $\leq 5\%$  uncertainty in magnitude, (green circles)  $5^\circ$ - $10^\circ$  uncertainty in orientation and  $5$ - $10\%$  uncertainty in magnitude, (red circles)  $10^\circ$ - $15^\circ$  uncertainty in orientation and  $10$ - $15\%$  uncertainty in magnitude. The order of the eight states was chosen to minimize the overall RMSD compared to the zero error ensemble. Each state defined as an inter-helical domain orientation is represented using a unit quaternion; a 4-dimensional complex number that represents an orientation as a single axis rotation from the z-axis. The relationship between the quaternions and the Euler angles is given in Equation 14. Shown are the values for the four quaternion components;  $Q_0$ ,  $Q_1$ ,  $Q_2$ , and  $Q_3$ .  $Q_0$  encodes the rotational amplitude and  $Q_1$ ,  $Q_2$ , and  $Q_3$  encode the x, y and z components of the rotation axis, respectively.
