# Supplementary material
Source: PubMed Central journal article supplement (PMC3320164)

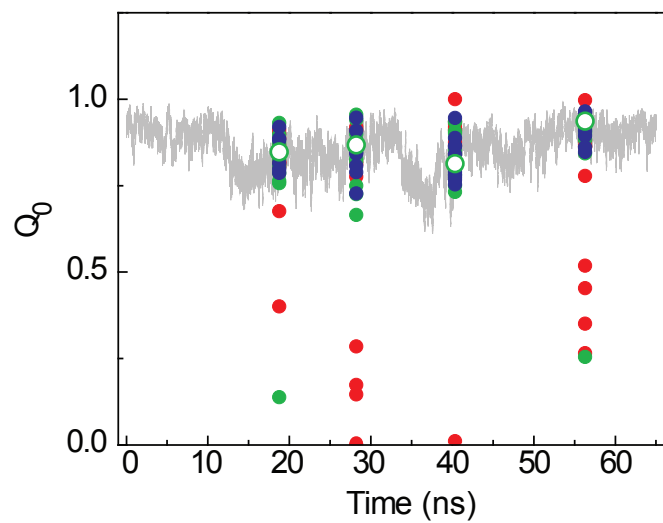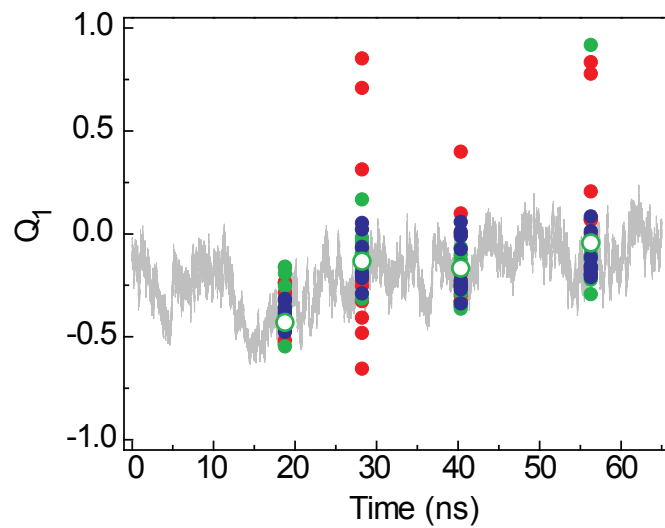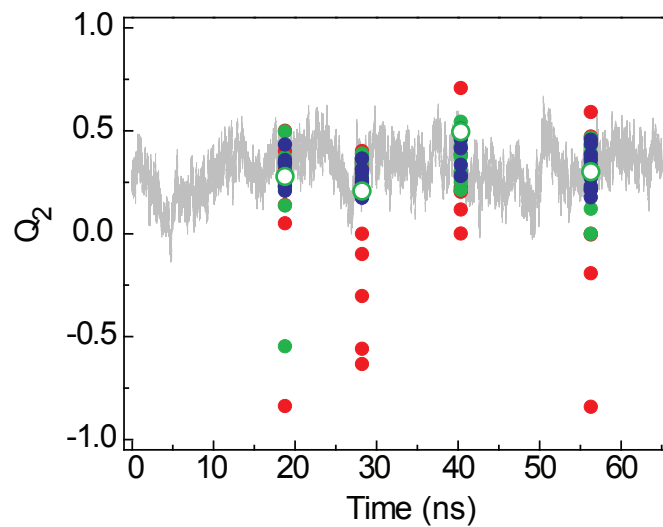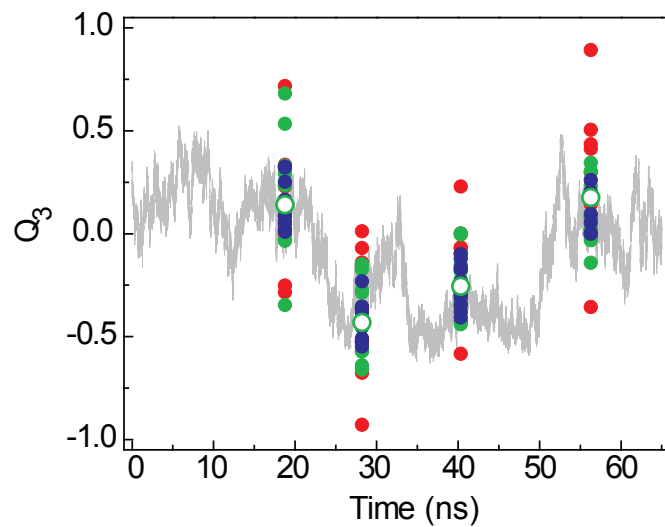

Supplement: NIHMS91229-supplement-2_si_002.pdf [file NIHMS91229-supplement-2_si_002.pdf]

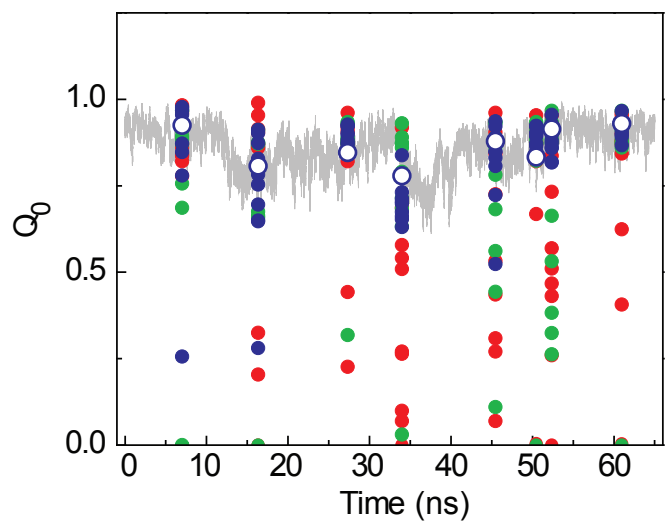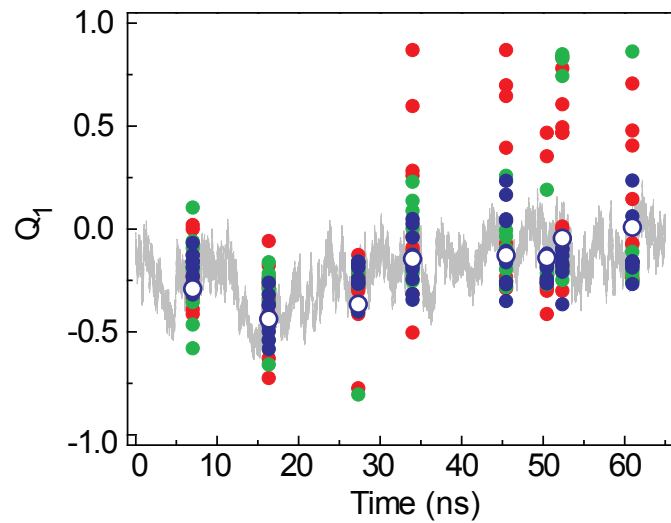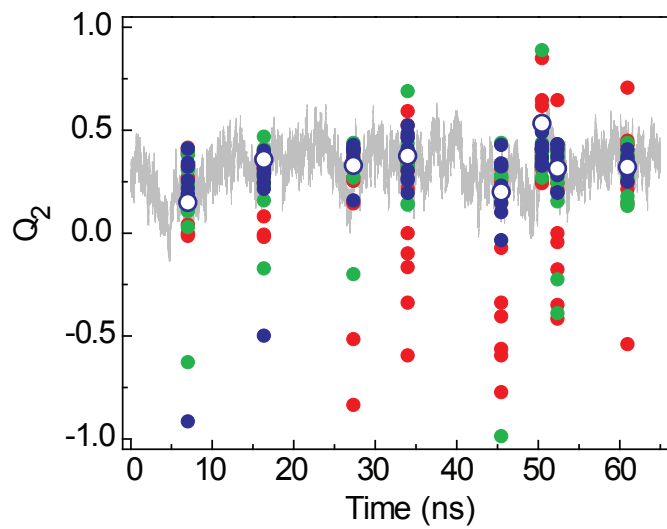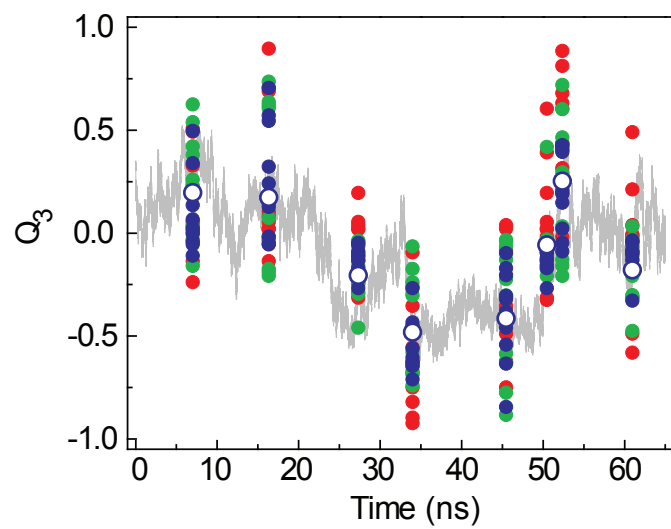

Supplement: NIHMS91229-supplement-3_si_003.pdf [file NIHMS91229-supplement-3_si_003.pdf]
